# Supplementary material for: Glioblastoma and cerebral organoids: development and analysis of an in vitro model for glioblastoma migration
Source: PubMed Central journal article supplement (PMC10061278; doi:10.1002/1878-0261.13389), 2023-02-18

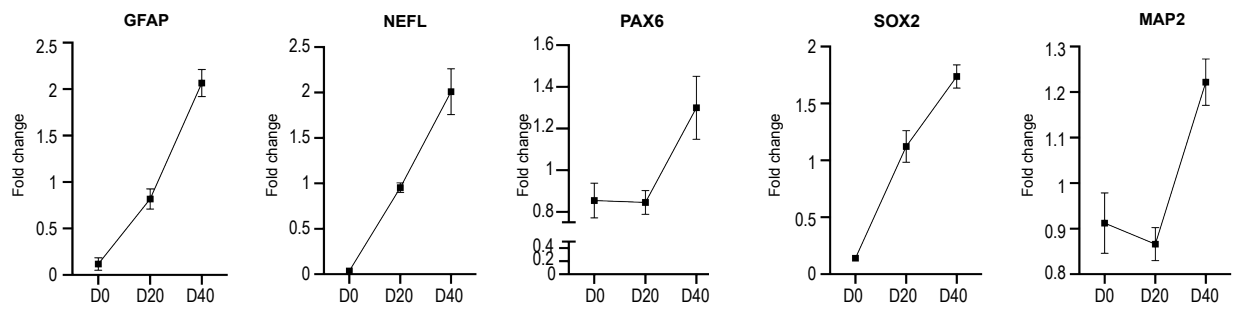

Supplement: MOL2-17-647-s001.pdf [file MOL2-17-647-s001.pdf]
